# Supplementary material for: Cidofovir selectivity is based on the different response of normal and cancer cells to DNA damage
Source: PubMed Central journal article supplement (PMC3681722; doi:10.1186/1755-8794-6-18), 2013-05-23

**Additional file 1. Normalization, filtering, and analysis of microarray data derived from CDV treated and untreated cells.**

Flow chart of the microarray experiments that was applied to obtain our data sets.

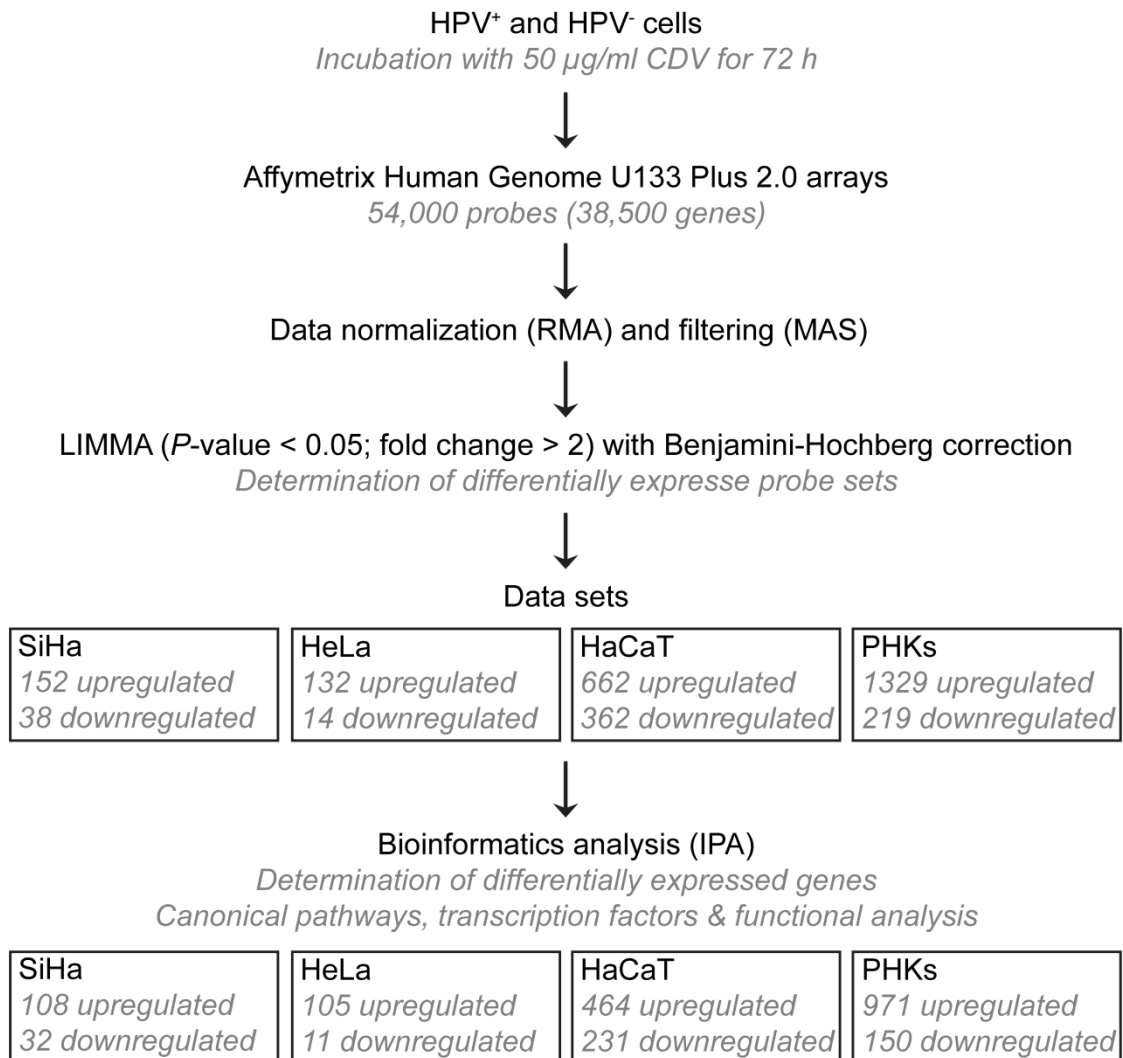

Supplement: 1755-8794-6-18-S1.pdf [file 1755-8794-6-18-S1.pdf]
