# Supplementary material for: Cidofovir selectivity is based on the different response of normal and cancer cells to DNA damage
Source: PubMed Central journal article supplement (PMC3681722; doi:10.1186/1755-8794-6-18), 2013-05-23

# HeLa

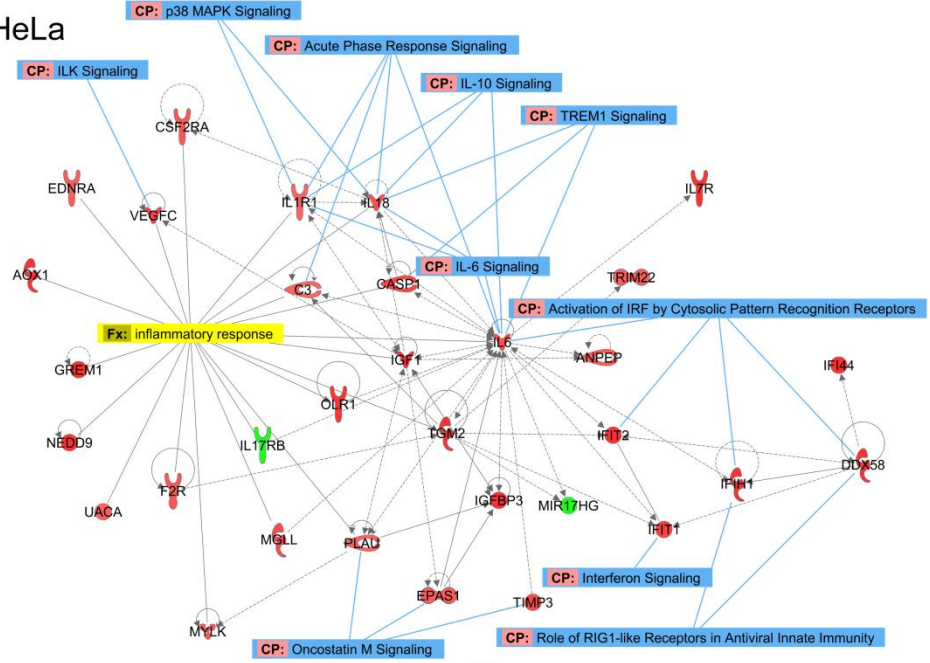

# PHKs

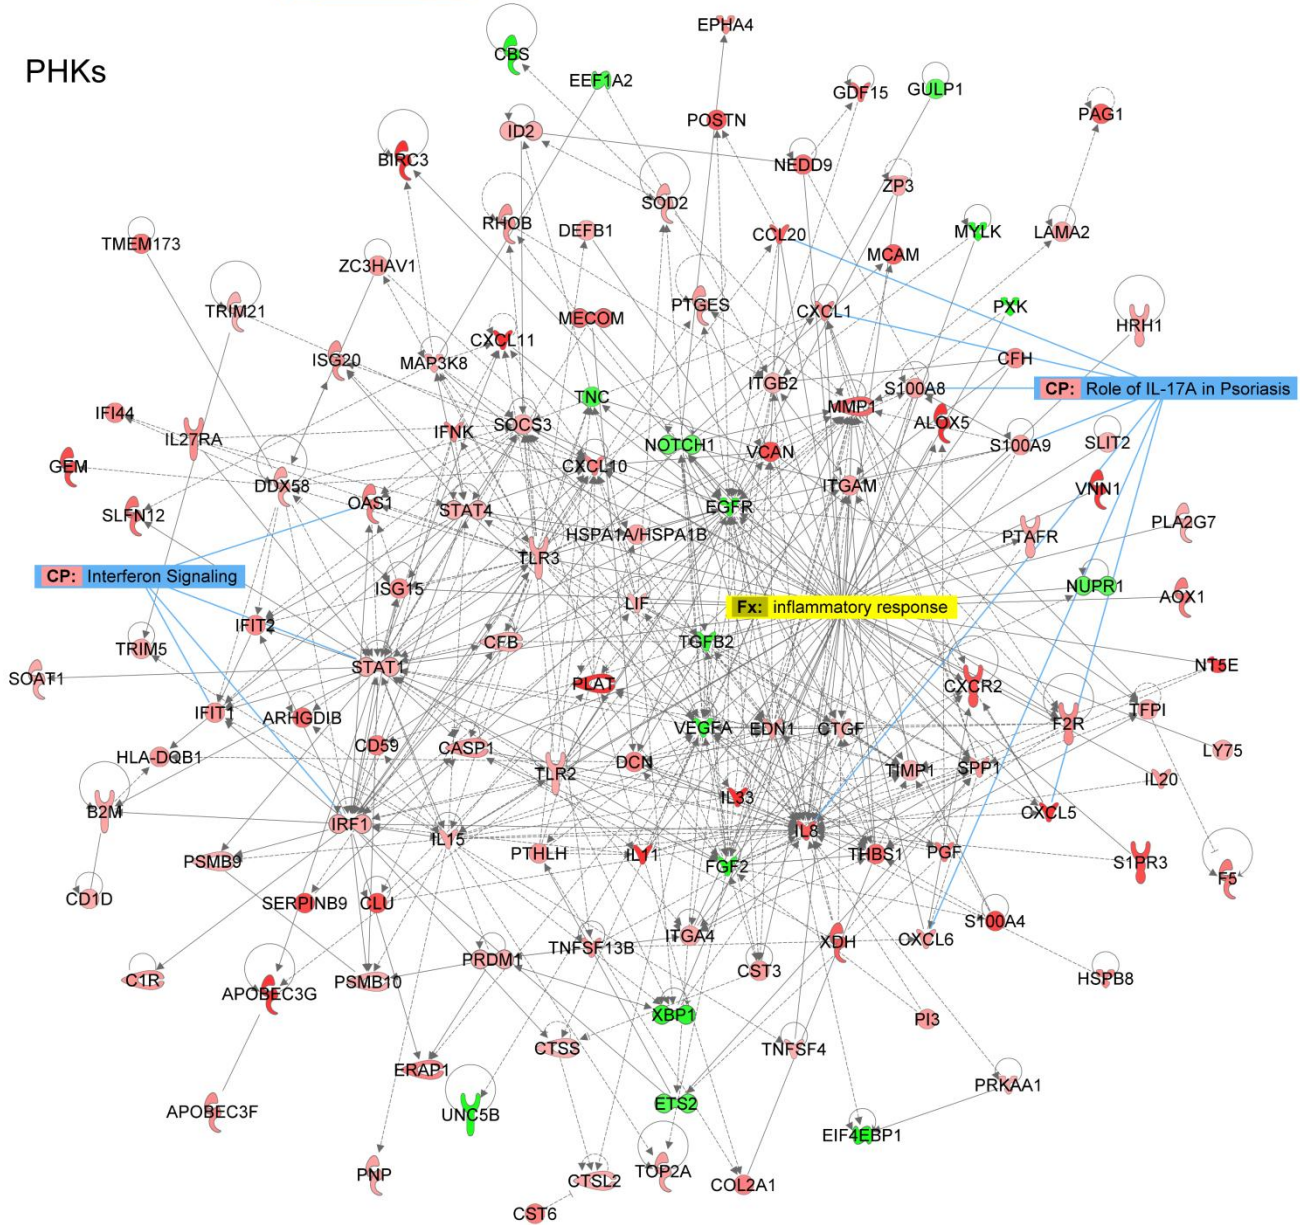

Supplement: 1755-8794-6-18-S5.pdf [file 1755-8794-6-18-S5.pdf]
